# Supplementary material for: IRF4 Transcription Factor-Dependent CD11b+ Dendritic Cells in Human and Mouse Control Mucosal IL-17 Cytokine Responses
Source: PubMed Central journal article supplement — Immunity. 2013 May 23;38(5):970–83. doi: 10.1016/j.immuni.2013.04.011 (PMC3666057; doi:10.1016/j.immuni.2013.04.011), 2013-05-23
Supplement: mmc1.pdf [file mmc1.pdf]

## Supplemental Information

### IRF4 Transcription Factor-Dependent

### CD11b<sup>+</sup> Dendritic Cells in Human and Mouse

### Control Mucosal IL-17 Cytokine Responses

Andreas Schlitzer, Naomi McGovern, Pearline Teo, Teresa Zelante, Koji Atarashi, Donovan Low, Adrian W.S. Ho, Peter See, Amanda Shin, Pavandip Singh Wasan, Guillaume Hoeffel, Benoit Malleret, Alexander Heiseke, Samantha Chew, Laura Jardine, Harriet A. Purvis, Catharien M.U. Hilkens, John Tam, Michael Poidinger, E. Richard Stanley, Anne B. Krug, Laurent Renia, Baalasubramanian Sivasankar, Lai Guan Ng, Matthew Collin, Paola Ricciardi-Castagnoli, Kenya Honda, Muzlifah Haniffa, and Florent Ginhoux

### Supplemental Inventory

#### 1. Supplemental Figures and Tables

Figure S1, Related to Figure 1

Figure S2, Related to Figure 2 and 3

Figure S3, Related to Figure 4

Figure S4, Related to Figure 5

Figure S5, Related to Figure 5

Figure S6, Related to Figure 7

Table S1, Related to Figure 3

Table S2, Related to Figure 6

Table S3, Related to Figure 6

#### 2. Supplemental Experimental Procedures

#### 3. Supplemental References

Supplementary figure 1 Sorting strategy for mouse lung and small intestinal DC

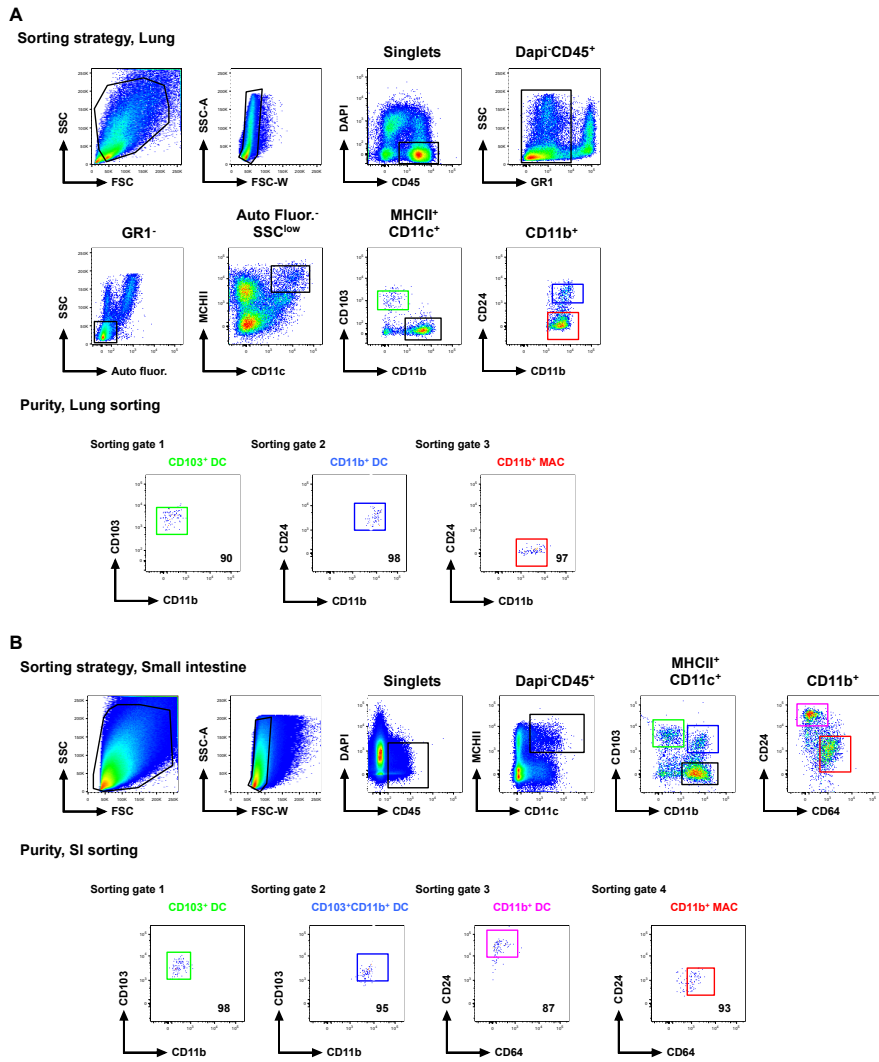

Supplementary figure 1 Sorting strategy for mouse lung and small intestinal DC  
 Sorting strategy of lung CD103<sup>+</sup> and CD11b<sup>+</sup> DC as well as CD11b<sup>+</sup> Macs from steady state WT mice (A). Sorting strategy of small intestinal CD103<sup>+</sup>, CD103<sup>+</sup>CD11b<sup>+</sup> and CD11b<sup>+</sup> DC as well as CD11b<sup>+</sup> Macs from steady state WT mice (B).

Supplementary figure 2 Chimerism of blood granulocytes in mixed BM chimeras

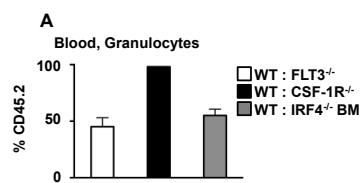

Supplementary figure 2 Chimerism of blood granulocytes in mixed BM chimeras  
Blood chimerism of granulocytes of FLT3<sup>-/-</sup>, CSF-1R<sup>-/-</sup> and IRF4<sup>-/-</sup> mixed BM chimeras 4 weeks after irradiation (mean  $\pm$  SEM, n=4) (A).

Supplementary figure 3 Flow cytometric analysis of mouse colonic and small intestinal lamina propria

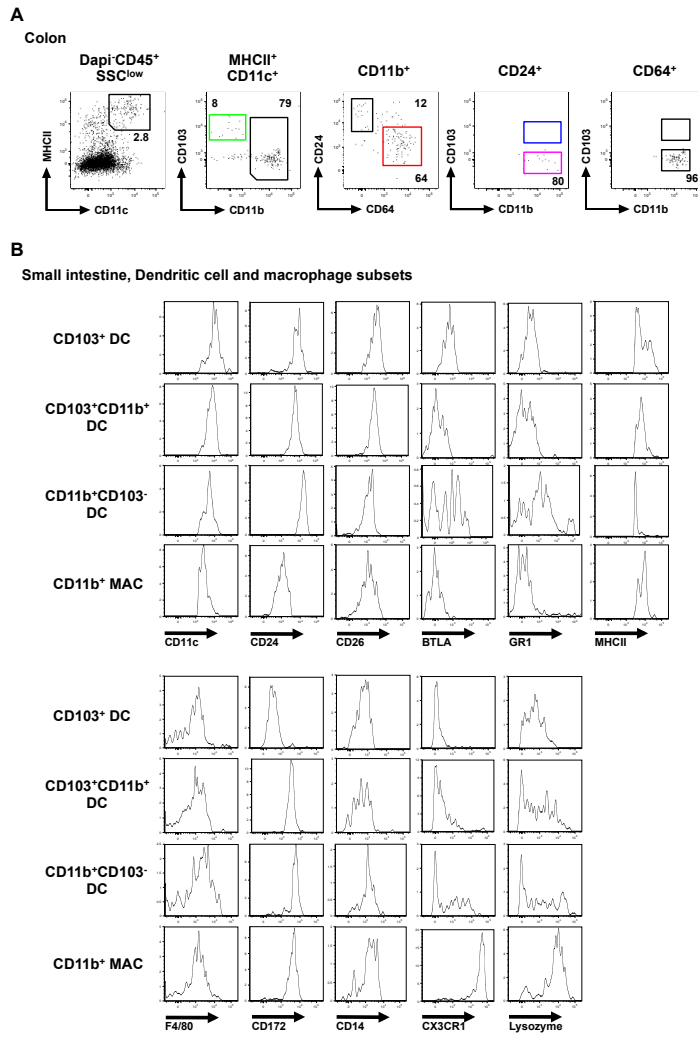

Supplementary figure 3 Flow cytometric analysis of mouse colonic and small intestinal lamina propria

Analysis of the colonic lamina propria DC compartment for the depicted markers by flow cytometry. Dot plots were gated as indicated (n=5) (A). DC and macrophage populations within the SI-LP were labeled with antibodies specific for the indicated markers, or an isotype-matched control antibody and analyzed by flow cytometry (n=3) (B).

Supplementary figure 4 Lung CD24<sup>+</sup>CD11b<sup>+</sup> DCs and gut LP CD24<sup>+</sup>CD103<sup>+</sup>CD11b<sup>+</sup> DCs are absent in *Itgax-cre Irf4<sup>fl/fl</sup>* but not in any other organ

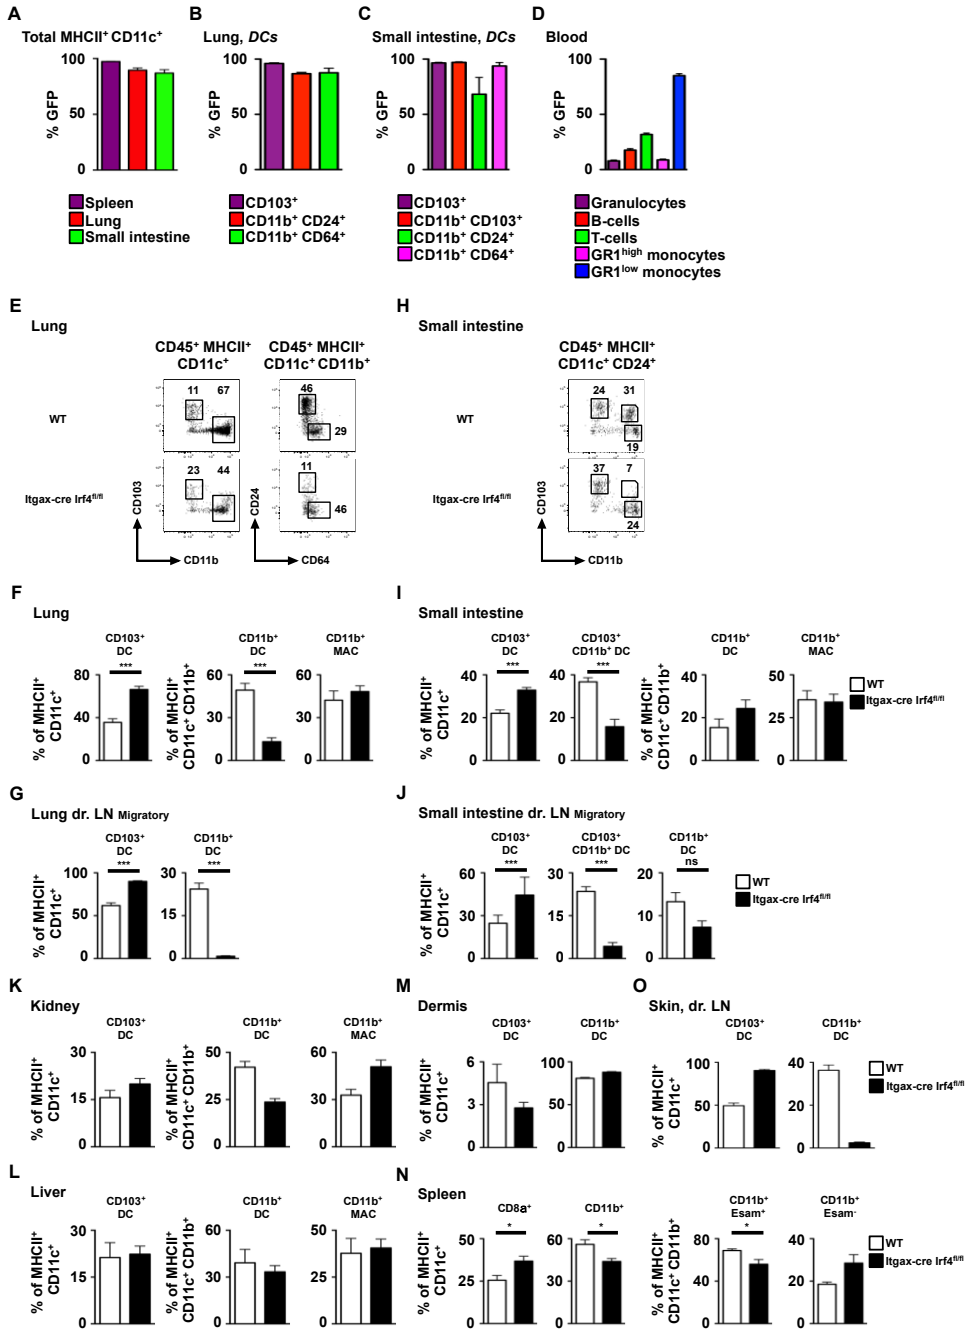

**Supplementary figure 4 Lung CD24<sup>+</sup>CD11b<sup>+</sup> DCs and gut LP CD24<sup>+</sup>CD103<sup>+</sup>CD11b<sup>+</sup> DCs are absent in *Ilgax-cre Irf4<sup>fl/fl</sup>* but not in any other organ**

Bar graphs depict percentages of GFP<sup>+</sup> cells in the MHCII<sup>+</sup>CD11c<sup>+</sup> fraction of spleen, lung and small intestine of *Ilgax-cre Irf4<sup>fl/fl</sup>* mice (mean ± SEM, n=4) (A). Bar graphs depict the percentage of the indicated cell populations in the indicated organs in *Ilgax-cre Irf4<sup>fl/fl</sup>* mice (mean ± SEM, n=4) (B-D). Cell populations within the lung (E) and SI-LP (H) of WT control littermate (upper panel) and *Ilgax-cre Irf4<sup>fl/fl</sup>* (lower panel) mice were labeled with antibodies specific for the indicated markers, before flow cytometric analysis (n=7). Bar graphs depict percentage of DC and macrophage populations in WT (white bars) and *Ilgax-cre Irf4<sup>fl/fl</sup>* (black bars) mice in the total Dapi<sup>+</sup>CD45<sup>+</sup>SSC<sup>low</sup>MHCII<sup>+</sup>CD11c<sup>+</sup> or Dapi<sup>+</sup>CD45<sup>+</sup>SSC<sup>low</sup>MHCII<sup>+</sup>CD11c<sup>+</sup>CD11b<sup>+</sup> fractions of the indicated tissues (F-J, n=7, mean ± SEM). Bar graphs depict percentage of DC and macrophage populations in WT (white bars) *Ilgax-cre Irf4<sup>fl/fl</sup>* (black bars) mice in the total Dapi<sup>+</sup>CD45<sup>+</sup>SSC<sup>low</sup>MHCII<sup>+</sup>CD11c<sup>+</sup> or Dapi<sup>+</sup>CD45<sup>+</sup>SSC<sup>low</sup>MHCII<sup>+</sup>CD11c<sup>+</sup>CD11b<sup>+</sup> fractions of the indicated tissues (K-O, n=7, mean ± SEM).

Supplementary figure 5 CD24<sup>+</sup>CD11b<sup>+</sup> DCs show no developmental defect but enhanced apoptosis in the lung

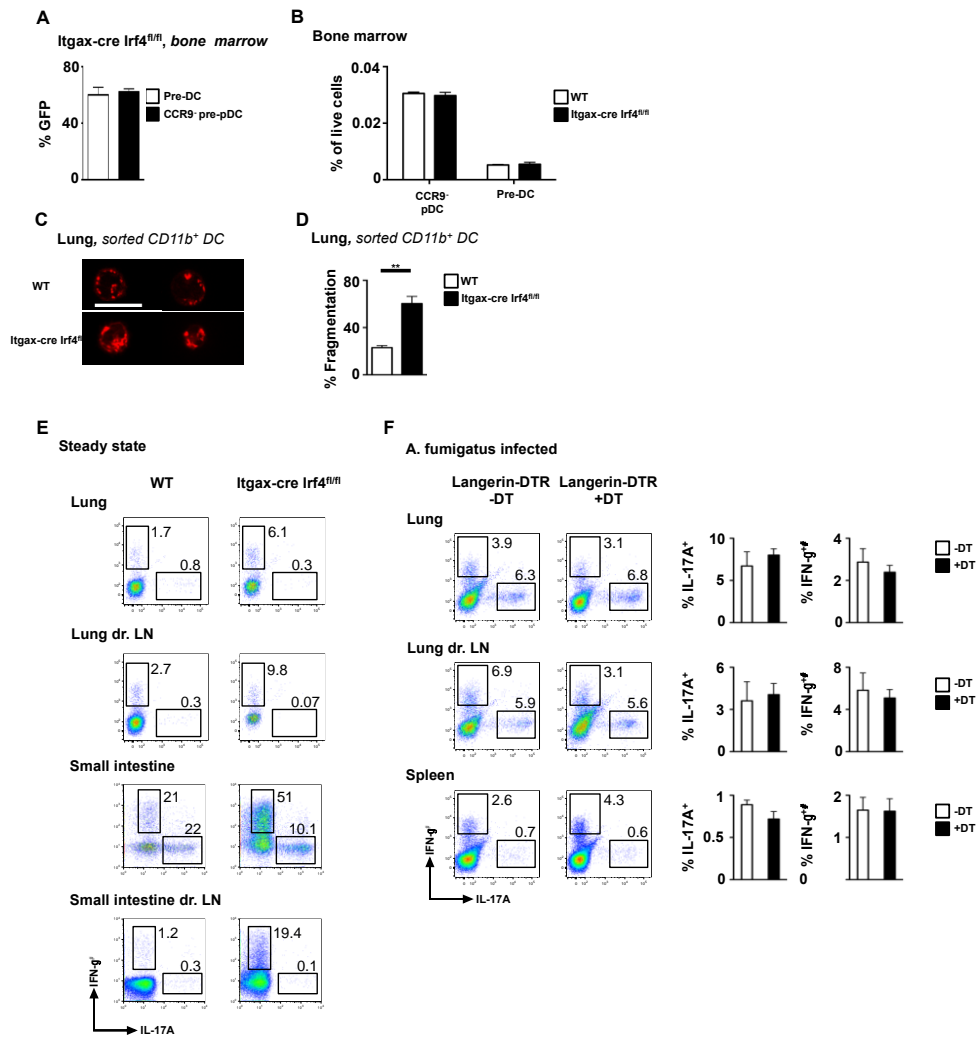

**Supplementary figure 5 CD24<sup>+</sup>CD11b<sup>+</sup> DCs show no developmental defect but enhanced apoptosis in the lung**

Bar graphs depict percentages of GFP<sup>+</sup> cells in the indicated cell population of *Ilgax-cre Irf4<sup>fl/fl</sup>* mice (mean  $\pm$  SEM, n=4) (A). WT (white bars) and *Ilgax-cre Irf4<sup>fl/fl</sup>* (black bars) BM was stained for the depicted precursor populations and their abundance was quantified as % of live cells (B, n=3, mean  $\pm$  SEM). Lung CD11b<sup>+</sup> DCs were stained with Mitotracker red and analyzed for mitochondrial fragmentation. Images show WT and *Ilgax-cre Irf4<sup>fl/fl</sup>* CD11b<sup>+</sup> DCs from the lung stained with Mitotracker red (C) (representative image, scale bar represents 10 $\mu$ m). Bar graph depicts percentage of cells with fragmented mitochondria within the population (D) (n  $\geq$  100 cells, mean  $\pm$  SEM). Dot blots show 6h PMA/Ionomycin restimulated lung, lung LN, small intestine and mesenteric LN of WT or *Ilgax-cre Irf4<sup>fl/fl</sup>* mice. Depicted tissues were gated for DAPI-CD3<sup>+</sup>CD4<sup>+</sup> and analyzed for IL-17A<sup>+</sup> and IFN- $\gamma$  expression (n=2) (E). Langerin-DTR mice were injected, or not, with DT (day -1) and intranasally infected (day 0) with *A. fumigatus*. Mice were sacrificed 7 days after infection. Dot plots show CD3<sup>+</sup>CD4<sup>+</sup> T-cells from the indicated tissues after 6h of PMA/Ionomycin restimulation. Cells were labeled with antibodies specific for IL-17A and IFN- $\gamma$ . Bar graphs show the percentage of IL-17A<sup>+</sup> or IFN- $\gamma$ <sup>+</sup> CD3<sup>+</sup>CD4<sup>+</sup> T-cells in the indicated organs 7 days after infection with *A. fumigatus* (n=2, mean  $\pm$  SEM) (F).



Supplementary figure 6 Gating strategy for human DC subsets

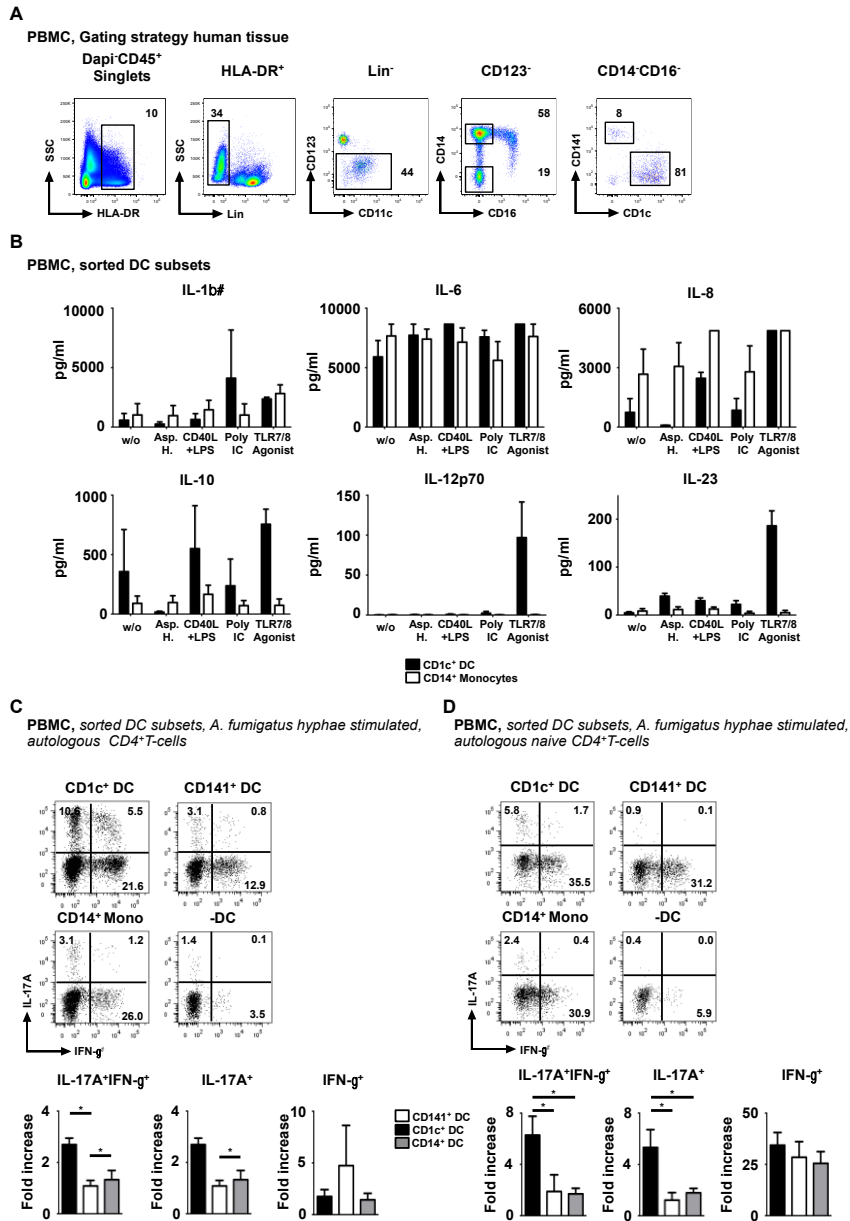

Supplementary figure 6 Gating strategy for human DC subsets

Gating and sorting strategy for PBMC, human lung and human small intestine (A). Sorted DC subsets derived from human PBMC stimulated with the indicated stimuli for 24hs. Depicted cytokines were measure by CBA (n=3, mean  $\pm$  SEM) (B). DC subsets and bulk and naive CD4+ T-cells were cocultured for 10 days in the presence of A. *Fumigatus* hyphae, restimulated and analyzed for the expression of IFN-g and IL-17A (n=3, mean  $\pm$  SEM) (C, D).

Supplementary table 1

Transcription factors differentially expressed between splenic CD8a<sup>+</sup>/ lung CD103<sup>+</sup> DCs and splenic CD4<sup>+</sup> / lung CD11b<sup>+</sup> DC revealed using the SAM algorithm

| Entrez_ID | Gene Symbol         | Gene Name                                             |
|-----------|---------------------|-------------------------------------------------------|
| 21413     | <i>TCF4</i>         | transcription factor 4                                |
| 15900     | <i>IRF8</i>         | interferon regulatory factor 8                        |
| 100045165 | <i>GM4223</i>       | predicted gene 4223; similar to Csf3r protein         |
| 12986     | <i>LOC100045165</i> | predicted gene 4223; similar to Csf3r protein         |
| 100043091 | <i>CSF3R</i>        | predicted gene 4223; similar to Csf3r protein         |
| 15902     | <i>ID2</i>          | inhibitor of DNA binding 2                            |
| 381319    | <i>BATF3</i>        | basic leucine zipper transcription factor, ATF-like 3 |
| 14581     | <i>GFI1</i>         | growth factor independent 1                           |
| 22433     | <i>XBP1</i>         | X-box binding protein 1                               |
| 14255     | <i>FLT3</i>         | FMS-like tyrosine kinase 3                            |
| 270110    | <i>IRF2BP2</i>      | interferon regulatory factor 2 binding protein 2      |
| 16600     | <i>KLF4</i>         | Kruppel-like factor 4 (gut)                           |
| 16363     | <i>IRF2</i>         | interferon regulatory factor 2                        |
| 13653     | <i>EGR1</i>         | early growth response 1                               |
| 19698     | <i>RELB</i>         | avian reticuloendotheliosis viral oncogene related B  |
| 12399     | <i>RUNX3</i>        | runt related transcription factor 3                   |
| 12982     | <i>CSF2RA</i>       | colony stimulating factor 2 receptor, alpha           |
| 20850     | <i>STAT5A</i>       | signal transducer and activator of transcription 5A   |
| 22778     | <i>IKZF1</i>        | IKAROS family zinc finger 1                           |
| 12978     | <i>CSF1R</i>        | colony stimulating factor 1 receptor                  |
| 20375     | <i>SFPI1</i>        | SFFV proviral integration 1                           |
| 12983     | <i>CSF2RB</i>       | colony stimulating factor 2 receptor, beta            |
| 12984     | <i>CSF2RB2</i>      | colony stimulating factor 2 receptor, beta 2          |
| 16364     | <i>IRF4</i>         | interferon regulatory factor 4                        |
| 20848     | <i>LOC100045296</i> | similar to Stat3B                                     |
| 100045296 | <i>STAT3</i>        | signal transducer and activator of transcription 3    |

Supplementary table 2

Differentially expressed genes of mouse CD11b<sup>+</sup> DC compared to mouse CD11b<sup>+</sup> Mac.  
All genes upregulated 1.5fold or more

| Entrez_ID | Gene Symbol     | Gene Name                                        |
|-----------|-----------------|--------------------------------------------------|
| 11630     | <i>AIM1</i>     | absent in melanoma 1                             |
| 11658     | <i>ALCAM</i>    | activated leukocyte cell adhesion molecule       |
| 11676     | <i>ALDOC</i>    | aldolase C, fructose-bisphosphate                |
| 11732     | <i>ANK</i>      | progressive ankylosis                            |
| 11799     | <i>BIRC5</i>    | baculoviral IAP repeat-containing 5              |
| 11828     | <i>AQP3</i>     | aquaporin 3                                      |
| 12040     | <i>BCKDHB</i>   | branched chain ketoacid dehydrogenase E1         |
| 12257     | <i>TSPO</i>     | translocator protein                             |
| 12306     | <i>ANXA2</i>    | similar to Annexin A2 (Annexin II)               |
| 12315     | <i>CALM3</i>    | calmodulin 3                                     |
| 12332     | <i>CAPG</i>     | capping protein (actin filament), gelsolin-like  |
| 12337     | <i>CAPN5</i>    | calpain 5                                        |
| 12443     | <i>CCND1</i>    | cyclin D1                                        |
| 12444     | <i>CCND2</i>    | cyclin D2                                        |
| 12481     | <i>CD2</i>      | CD2 antigen                                      |
| 12519     | <i>CD80</i>     | CD80 antigen                                     |
| 12550     | <i>CDH1</i>     | cadherin 1                                       |
| 12579     | <i>CDKN2B</i>   | similar to Cyclin-dependent kinase 4 inhibitor B |
| 12615     | <i>CENPA</i>    | centromere protein A                             |
| 12700     | <i>CISH</i>     | cytokine inducible SH2-containing protein        |
| 12702     | <i>SOCS3</i>    | suppressor of cytokine signaling 3               |
| 12775     | <i>CCR7</i>     | chemokine (C-C motif) receptor 7                 |
| 12827     | <i>COL4A2</i>   | collagen, type IV, alpha 2                       |
| 13007     | <i>CSRP1</i>    | cysteine and glycine-rich protein 1              |
| 13169     | <i>DBNL</i>     | drebrin-like                                     |
| 13449     | <i>DOK2</i>     | docking protein 2                                |
| 13482     | <i>DPP4</i>     | dipeptidylpeptidase 4                            |
| 13587     | <i>EAR2</i>     | eosinophil-associated, ribonuclease A family     |
| 13730     | <i>EMP1</i>     | epithelial membrane protein 1                    |
| 13807     | <i>ENO2</i>     | enolase 2, gamma neuronal                        |
| 13836     | <i>EPHA2</i>    | Eph receptor A2                                  |
| 14025     | <i>BCL11A</i>   | B-cell CLL/lymphoma 11A (zinc finger protein)    |
| 14064     | <i>F2RL2</i>    | coagulation factor II (thrombin) receptor-like 2 |
| 14083     | <i>PTK2</i>     | PTK2 protein tyrosine kinase 2                   |
| 14086     | <i>FSCN1</i>    | fascin homolog 1                                 |
| 14130     | <i>FCGR2B</i>   | Fc receptor, IgG, low affinity IIb               |
| 14190     | <i>FGL2</i>     | fibrinogen-like protein 2                        |
| 14194     | <i>FH1</i>      | fumarate hydratase 1                             |
| 14204     | <i>IL4I1</i>    | interleukin 4 induced 1                          |
| 14268     | <i>FN1</i>      | fibronectin 1                                    |
| 14700     | <i>GNG10</i>    | guanine nucleotide binding protein               |
| 14726     | <i>PDPN</i>     | podoplanin                                       |
| 14793     | <i>CDCA3</i>    | cell division cycle associated 3                 |
| 15000     | <i>H2-DMB2</i>  | histocompatibility 2, class II, locus Mb2        |
| 15001     | <i>H2-OA</i>    | histocompatibility 2, O region alpha locus       |
| 15002     | <i>H2-OB</i>    | histocompatibility 2, O region beta locus        |
| 15108     | <i>HSD17B10</i> | hydroxysteroid (17-beta) dehydrogenase 10        |
| 15270     | <i>H2AFX</i>    | H2A histone family, member X                     |
| 15277     | <i>HK2</i>      | hexokinase 2                                     |
| 15460     | <i>HR</i>       | hairless                                         |
| 16164     | <i>IL13RA1</i>  | interleukin 13 receptor, alpha 1                 |
| 16174     | <i>IL18RAP</i>  | interleukin 18 receptor accessory protein        |

|       |                  |                                                         |
|-------|------------------|---------------------------------------------------------|
| 16178 | <i>IL1R2</i>     | interleukin 1 receptor, type II                         |
| 16193 | <i>IL6</i>       | interleukin 6                                           |
| 16364 | <i>IRF4</i>      | interferon regulatory factor 4                          |
| 16407 | <i>ITGAE</i>     | integrin alpha E, epithelial-associated                 |
| 16421 | <i>ITGB7</i>     | integrin beta 7                                         |
| 16438 | <i>ITPR1</i>     | inositol 1,4,5-triphosphate receptor 1                  |
| 16452 | <i>JAK2</i>      | Janus kinase 2                                          |
| 16498 | <i>KCNAB2</i>    | potassium voltage-gated channel                         |
| 16541 | <i>NAPSA</i>     | napsin A aspartic peptidase                             |
| 16643 | <i>KLRD1</i>     | killer cell lectin-like receptor, subfamily D, member 1 |
| 16911 | <i>LMO4</i>      | LIM domain only 4                                       |
| 16952 | <i>ANXA1</i>     | annexin A1                                              |
| 16985 | <i>LSP1</i>      | lymphocyte specific 1                                   |
| 16995 | <i>LTB4R1</i>    | leukotriene B4 receptor 1                               |
| 17304 | <i>MFGE8</i>     | milk fat globule-EGF factor 8 protein                   |
| 17427 | <i>MNS1</i>      | meiosis-specific nuclear structural protein 1           |
| 17532 | <i>MRAS</i>      | muscle and microspikes RAS                              |
| 17750 | <i>MT2</i>       | metallothionein 2                                       |
| 17768 | <i>MTHFD2</i>    | methylenetetrahydrofolate cyclohydrolase                |
| 17939 | <i>NAGA</i>      | N-acetyl galactosaminidase, alpha                       |
| 18074 | <i>NID2</i>      | nidogen 2                                               |
| 18105 | <i>NQO2</i>      | NAD(P)H dehydrogenase, quinone 2                        |
| 18441 | <i>P2RY1</i>     | purinergic receptor P2Y, G-protein coupled 1            |
| 18476 | <i>PAFAH1B3</i>  | platelet-activating factor acetylhydrolase              |
| 18479 | <i>PAK1</i>      | p21 protein (Cdc42/Rac)-activated kinase 1              |
| 18569 | <i>PDCD4</i>     | programmed cell death 4                                 |
| 18636 | <i>CFP</i>       | complement factor properdin                             |
| 18817 | <i>PLK1</i>      | polo-like kinase 1 (Drosophila)                         |
| 18824 | <i>PLP2</i>      | proteolipid protein 2; predicted gene 13669             |
| 19088 | <i>PRKAR2B</i>   | protein kinase, cAMP dependent regulatory, type II beta |
| 19354 | <i>RAC2</i>      | RAS-related C3 botulinum substrate 2                    |
| 19378 | <i>ALDH1A2</i>   | aldehyde dehydrogenase family 1, subfamily A2           |
| 20190 | <i>RYR1</i>      | ryanodine receptor 1, skeletal muscle                   |
| 20194 | <i>SI00A10</i>   | S100 calcium binding protein A10 (calpactin)            |
| 20200 | <i>SI00A6</i>    | S100 calcium binding protein A6 (calyculin)             |
| 20249 | <i>SCD1</i>      | stearoyl-Coenzyme A desaturase 1                        |
| 20295 | <i>CCL17</i>     | chemokine (C-C motif) ligand 17                         |
| 20299 | <i>CCL22</i>     | chemokine (C-C motif) ligand 22                         |
| 20312 | <i>CX3CL1</i>    | chemokine (C-X3-C motif) ligand 1                       |
| 20344 | <i>SELP</i>      | selectin, platelet                                      |
| 20351 | <i>SEMA4A</i>    | semaphorin 4A                                           |
| 20454 | <i>ST3GAL5</i>   | ST3 beta-galactoside alpha-2,3-sialyltransferase 5      |
| 20525 | <i>SLC2A1</i>    | solute carrier family 2, member 1                       |
| 20527 | <i>SLC2A3</i>    | solute carrier family 2, member 3                       |
| 20698 | <i>SPHK1</i>     | sphingosine kinase 1                                    |
| 20708 | <i>SERPINB6B</i> | serine (or cysteine) peptidase inhibitor                |
| 20877 | <i>AURKB</i>     | aurora kinase B                                         |
| 20893 | <i>BHLHE40</i>   | basic helix-loop-helix family, member e40               |
| 21417 | <i>ZEB1</i>      | zinc finger E-box binding homeobox 1                    |
| 21753 | <i>TES</i>       | testis derived transcript                               |
| 21754 | <i>TESK1</i>     | testis specific protein kinase 1                        |
| 21844 | <i>TIAM1</i>     | T-cell lymphoma invasion and metastasis 1               |
| 21936 | <i>TNFRSF18</i>  | tumor necrosis factor receptor superfamily, member 18   |

|       |                      |                                                               |
|-------|----------------------|---------------------------------------------------------------|
| 21948 | <i>CD70</i>          | CD70 antigen                                                  |
| 21950 | <i>TNFSF9</i>        | tumor necrosis factor (ligand) superfamily, member 9          |
| 21953 | <i>TNNI2</i>         | troponin I, skeletal, fast 2                                  |
| 22032 | <i>TRAF4</i>         | TNF receptor associated factor 4                              |
| 22038 | <i>PLSCR1</i>        | phospholipid scramblase 1                                     |
| 22041 | <i>TRF</i>           | transferrin                                                   |
| 22142 | <i>TUBA1A</i>        | predicted gene 7172                                           |
| 22248 | <i>UNC119</i>        | unc-119 homolog (C. elegans)                                  |
| 22330 | <i>VCL</i>           | vinculin                                                      |
| 22337 | <i>VDR</i>           | vitamin D receptor                                            |
| 22368 | <i>TRPV2</i>         | transient receptor potential cation channel                   |
| 22793 | <i>ZYX</i>           | zyxin                                                         |
| 23792 | <i>ADAM23</i>        | a disintegrin and metallopeptidase domain 23                  |
| 23912 | <i>RHOF</i>          | ras homolog gene family, member f                             |
| 24050 | <i>3-SEP</i>         | septin 3                                                      |
| 26411 | <i>MAP4K1</i>        | mitogen-activated protein kinase kinase kinase kinase 1       |
| 26568 | <i>SLC27A3</i>       | solute carrier family 27 (fatty acid transporter), member 3   |
| 26914 | <i>H2AFY</i>         | H2A histone family, member Y                                  |
| 27049 | <i>ETV3</i>          | ets variant gene 3                                            |
| 27357 | <i>GYG</i>           | glycogenin                                                    |
| 27528 | <i>D0H4S114</i>      | DNA segment, human D4S114                                     |
| 30057 | <i>TIMMSB</i>        | translocase of inner mitochondrial membrane 8 homolog b       |
| 30928 | <i>ZFP238</i>        | zinc finger protein 238                                       |
| 50784 | <i>PPAP2C</i>        | phosphatidic acid phosphatase type 2C                         |
| 53313 | <i>ATP2A3</i>        | ATPase, Ca <sup>++</sup> transporting, ubiquitous             |
| 53318 | <i>PDLIM3</i>        | PDZ and LIM domain 3                                          |
| 53608 | <i>MAP3K6</i>        | mitogen-activated protein kinase kinase kinase 6              |
| 53860 | <i>SEP9</i>          | septin 9                                                      |
| 53877 | <i>EAR4</i>          | eosinophil-associated, ribonuclease A family, member 4        |
| 54563 | <i>NUP210</i>        | nucleoporin 210                                               |
| 56149 | <i>GRASP</i>         | General receptor for phosphoinositides 1                      |
| 56177 | <i>OLFM1</i>         | olfactomedin 1                                                |
| 56297 | <i>ARL6</i>          | ADP-ribosylation factor-like 6                                |
| 56349 | <i>NET1</i>          | predicted gene 8990; neuroepithelial cell transforming gene 1 |
| 56437 | <i>RRAD</i>          | Ras-related associated with diabetes                          |
| 56524 | <i>MPP6</i>          | membrane protein, palmitoylated 6                             |
| 56526 | <i>SEP 6</i>         | septin 6                                                      |
| 57262 | <i>RETNLA</i>        | resistin like alpha                                           |
| 58200 | <i>PPP1R1A</i>       | protein phosphatase 1, regulatory (inhibitor) subunit 1A      |
| 58861 | <i>CYSLTR1</i>       | cysteinyl leukotriene receptor 1                              |
| 64008 | <i>AQP9</i>          | aquaporin 9                                                   |
| 64095 | <i>GPR35</i>         | G protein-coupled receptor 35                                 |
| 64136 | <i>SDF2L1</i>        | stromal cell-derived factor 2-like 1                          |
| 66259 | <i>CAMK2N1</i>       | calcium/calmodulin-dependent protein kinase II inhibitor 1    |
| 66422 | <i>DCTPP1</i>        | dCTP pyrophosphatase 1                                        |
| 66815 | <i>CCDC109B</i>      | coiled-coil domain containing 109B                            |
| 66874 | <i>1200014J11RIK</i> | similar to RIKEN cDNA 1200014J11 gene                         |
| 66922 | <i>RRAS2</i>         | related RAS viral (r-ras) oncogene homolog 2                  |
| 67044 | <i>HIGD2A</i>        | HIG1 domain family, member 2A                                 |
| 67102 | <i>D16ERTD472E</i>   | DNA segment, Chr 16, ERATO Doi 472, expressed                 |
| 67166 | <i>ARL8B</i>         | ADP-ribosylation factor-like 8B                               |
| 67267 | <i>2900010M23RIK</i> | hypothetical protein LOC675054                                |
| 67647 | <i>4930523C07RIK</i> | RIKEN cDNA 4930523C07 gene                                    |

|        |                      |                                                          |
|--------|----------------------|----------------------------------------------------------|
| 67739  | <i>SLC48A1</i>       | solute carrier family 48 (heme transporter), member 1    |
| 67784  | <i>PLXND1</i>        | plexin D1                                                |
| 67800  | <i>DGAT2</i>         | diacylglycerol O-acyltransferase 2                       |
| 67846  | <i>TMEM39A</i>       | transmembrane protein 39a                                |
| 67941  | <i>RPS27L</i>        | ribosomal protein S27-like                               |
| 68026  | <i>2810417H13RIK</i> | predicted gene 15428                                     |
| 68870  | <i>1190002A17RIK</i> | RIKEN cDNA 1190002A17 gene                               |
| 69029  | <i>1500032L24RIK</i> | RIKEN cDNA 1500032L24 gene                               |
| 69165  | <i>CD209B</i>        | CD209b antigen                                           |
| 69189  | <i>1810033B17RIK</i> | RIKEN cDNA 1810033B17 gene                               |
| 69399  | <i>1700025G04RIK</i> | RIKEN cDNA 1700025G04 gene                               |
| 69635  | <i>DAPK1</i>         | death associated protein kinase 1                        |
| 69698  | <i>2310046K01RIK</i> | RIKEN cDNA 2310046K01 gene                               |
| 69797  | <i>1600029I14RIK</i> | thioredoxin domain containing 6                          |
| 69810  | <i>CLEC4B1</i>       | C-type lectin domain family 4, member b1                 |
| 69863  | <i>TTC39B</i>        | tetratricopeptide repeat domain 39B                      |
| 69982  | <i>SPINK2</i>        | serine peptidase inhibitor, Kazal type 2                 |
| 70025  | <i>ACOT7</i>         | acyl-CoA thioesterase 7                                  |
| 70031  | <i>CMTM8</i>         | CKLF-like MARVEL transmembrane domain containing 8       |
| 70536  | <i>QPCT</i>          | glutaminyl-peptide cyclotransferase (glutaminyl cyclase) |
| 71268  | <i>LRRFIP2</i>       | leucine rich repeat (in FLII) interacting protein 2      |
| 71302  | <i>ARHGAP26</i>      | RIKEN cDNA 9630014M24 gene                               |
| 71532  | <i>9030418K01RIK</i> | RIKEN cDNA 9030418K01 gene                               |
| 72084  | <i>PIGX</i>          | phosphatidylinositol glycan anchor biosynthesis, class X |
| 72324  | <i>PLXDC1</i>        | plexin domain containing 1                               |
| 72333  | <i>PALLD</i>         | palladin, cytoskeletal associated protein                |
| 72865  | <i>CXX1C</i>         | CAAX box 1 homolog C (human)                             |
| 73385  | <i>FAM177A</i>       | RIKEN cDNA 1700047I17 gene 2                             |
| 73835  | <i>IFITM5</i>        | interferon induced transmembrane protein 5               |
| 74015  | <i>FCHO1</i>         | FCH domain only 1                                        |
| 74134  | <i>CYP2S1</i>        | cytochrome P450, family 2, subfamily s, polypeptide 1    |
| 74145  | <i>F13A1</i>         | coagulation factor XIII, A1 subunit                      |
| 74340  | <i>AHCYL2</i>        | S-adenosylhomocysteine hydrolase-like 2                  |
| 75292  | <i>PRKD3</i>         | protein kinase D3                                        |
| 75766  | <i>TM7SF4</i>        | transmembrane 7 superfamily member 4                     |
| 75863  | <i>CLEC4G</i>        | C-type lectin domain family 4, member g                  |
| 76062  | <i>5830428M24RIK</i> | RIKEN cDNA 5830428M24 gene                               |
| 76263  | <i>GSTK1</i>         | glutathione S-transferase kappa 1                        |
| 76737  | <i>CRELD2</i>        | cysteine-rich with EGF-like domains 2                    |
| 77605  | <i>H2AFV</i>         | H2A histone family, member V                             |
| 78416  | <i>RNASE6</i>        | ribonuclease, RNase A family, 6                          |
| 78826  | <i>P2RY10</i>        | purinergic receptor P2Y, G-protein coupled 10            |
| 80885  | <i>NIACR1</i>        | niacin receptor 1                                        |
| 80891  | <i>FCRLS</i>         | Fc receptor-like 5, scavenger receptor                   |
| 80914  | <i>UCK2</i>          | uridine-cytidine kinase 2                                |
| 93671  | <i>CD163</i>         | CD163 antigen                                            |
| 93725  | <i>EAR10</i>         | eosinophil-associated, ribonuclease A family, member 9   |
| 94353  | <i>HMGN3</i>         | high mobility group nucleosomal binding domain 3         |
| 98256  | <i>KMO</i>           | kynurenine 3-monoxygenase (kynurenine 3-hydroxylase)     |
| 98752  | <i>FCRLA</i>         | Fc receptor-like A                                       |
| 103149 | <i>UPB1</i>          | ureidopropionase, beta                                   |
| 103711 | <i>PNPO</i>          | pyridoxine 5'-phosphate oxidase                          |
| 104175 | <i>SBK1</i>          | SH3-binding kinase 1                                     |

|           |                      |                                                              |
|-----------|----------------------|--------------------------------------------------------------|
| 105348    | <i>GOLM1</i>         | golgi membrane protein 1                                     |
| 105841    | <i>DENND3</i>        | DENN/MADD domain containing 3                                |
| 106795    | <i>TCF19</i>         | transcription factor 19                                      |
| 106840    | <i>UNC119B</i>       | unc-119 homolog B (C. elegans)                               |
| 107221    | <i>GPR120</i>        | G protein-coupled receptor 120                               |
| 107766    | <i>HAAO</i>          | 3-hydroxyanthranilate 3,4-dioxygenase                        |
| 108673    | <i>CCDC86</i>        | coiled-coil domain containing 86                             |
| 108956    | <i>APOL7C</i>        | predicted gene 8221; apolipoprotein L 7c                     |
| 109305    | <i>ORAI1</i>         | ORAI calcium release-activated calcium modulator 1           |
| 110033    | <i>KIF22</i>         | kinesin family member 22                                     |
| 170752    | <i>BCO2</i>          | beta-carotene oxygenase 2                                    |
| 170776    | <i>CD209C</i>        | similar to SIGNR2; CD209c antigen                            |
| 170779    | <i>CD209D</i>        | CD209d antigen                                               |
| 170786    | <i>CD209A</i>        | CD209a antigen                                               |
| 207777    | <i>BZRAP1</i>        | benzodiazepine receptor associated protein 1                 |
| 208638    | <i>SLC25A38</i>      | hypothetical protein LOC100048873                            |
| 216233    | <i>SOCS2</i>         | suppressor of cytokine signaling 2                           |
| 216864    | <i>MGL2</i>          | macrophage galactose specific lectin 2                       |
| 217835    | <i>RIN3</i>          | Ras and Rab interactor 3                                     |
| 217946    | <i>CDCA7L</i>        | cell division cycle associated 7 like                        |
| 224143    | <i>KTELC1</i>        | KTEL (Lys-Tyr-Glu-Leu) containing 1                          |
| 225912    | <i>CYBASC3</i>       | cytochrome b, ascorbate dependent 3                          |
| 226419    | <i>DYRK3</i>         | dual-specificity tyrosine phosphorylation regulated kinase 3 |
| 227659    | <i>SLC2A6</i>        | solute carrier family 2 , member 6                           |
| 229323    | <i>GPR171</i>        | G protein-coupled receptor 171                               |
| 233038    | <i>NCCRP1</i>        | non-specific cytotoxic cell receptor protein 1 homolog       |
| 233046    | <i>RASGRP4</i>       | RAS guanyl releasing protein 4                               |
| 233406    | <i>PRC1</i>          | protein regulator of cytokinesis 1                           |
| 234577    | <i>CPNE2</i>         | copine II                                                    |
| 237250    | <i>GM221</i>         | predicted gene 221                                           |
| 238377    | <i>GPR68</i>         | G protein-coupled receptor 68                                |
| 238875    | <i>GAPT</i>          | Grb2-binding adaptor                                         |
| 240047    | <i>MMP25</i>         | matrix metalloproteinase 25                                  |
| 243958    | <i>SIGLECG</i>       | sialic acid binding Ig-like lectin G                         |
| 246277    | <i>CSAD</i>          | cysteine sulfinic acid decarboxylase                         |
| 270066    | <i>SLC35E1</i>       | solute carrier family 35, member E1                          |
| 270152    | <i>AMICA1</i>        | adhesion molecule, interacts with CXADR antigen 1            |
| 271844    | <i>PLA2G4F</i>       | phospholipase A2, group IVF                                  |
| 272636    | <i>ESYT3</i>         | family with sequence similarity 62                           |
| 276891    | <i>TIMD4</i>         | T-cell immunoglobulin and mucin domain containing 4          |
| 320782    | <i>TMEM154</i>       | transmembrane protein 154                                    |
| 381269    | <i>MREG</i>          | melanoregulin                                                |
| 384009    | <i>GLIPR2</i>        | GLI pathogenesis-related 2                                   |
| 414084    | <i>TNIP3</i>         | TNFAIP3 interacting protein 3                                |
| 433470    | <i>AA467197</i>      | expressed sequence AA467197                                  |
| 664968    | <i>2210411K11RIK</i> | RIKEN cDNA 2210411K11 gene                                   |
| 671466    | <i>GMI4024</i>       | predicted gene 14024                                         |
| 100034251 | <i>GMI1428</i>       | predicted gene 11428                                         |
| 100042480 | <i>NHSL2</i>         | NHS-like 2;                                                  |

Supplementary table 3

Differentially expressed genes of mouse CD11b<sup>+</sup> Mac compared to mouse CD11b<sup>+</sup> DC.  
All genes upregulated 1.5fold or more

| Entrez_ID | Gene Symbol     | Gene Name                                     |
|-----------|-----------------|-----------------------------------------------|
| 11421     | <i>ACE</i>      | angiotensin I converting enzyme               |
| 11432     | <i>ACP2</i>     | acid phosphatase 2, lysosomal                 |
| 11491     | <i>ADAM17</i>   | a disintegrin and metallopeptidase domain 17  |
| 11520     | <i>PLIN2</i>    | adipose differentiation related protein       |
| 11655     | <i>ALAS1</i>    | aminolevulinic acid synthase 1                |
| 11727     | <i>ANG</i>      | angiogenin, ribonuclease, RNase A family, 5   |
| 11747     | <i>ANXA5</i>    | annexin A5                                    |
| 11810     | <i>APOBEC1</i>  | apolipoprotein B                              |
| 11816     | <i>APOE</i>     | apolipoprotein E                              |
| 11821     | <i>APRT</i>     | adenine phosphoribosyl transferase            |
| 11852     | <i>RHOB</i>     | ras homolog gene family, member B             |
| 11910     | <i>ATF3</i>     | activating transcription factor 3             |
| 12259     | <i>C1QA</i>     | complement component 1, q subcomponent        |
| 12260     | <i>C1QB</i>     | complement component 1, q subcomponent        |
| 12262     | <i>C1QC</i>     | complement component 1, q subcomponent        |
| 12266     | <i>C3</i>       | complement component 3                        |
| 12475     | <i>CD14</i>     | CD14 antigen                                  |
| 12512     | <i>CD63</i>     | CD63 antigen                                  |
| 12514     | <i>CD68</i>     | CD68 antigen                                  |
| 12517     | <i>CD72</i>     | CD72 antigen                                  |
| 12520     | <i>CD81</i>     | CD81 antigen                                  |
| 12571     | <i>CDK6</i>     | cyclin-dependent kinase 6                     |
| 12585     | <i>CDR2</i>     | cerebellar degeneration-related 2             |
| 12608     | <i>CEBPB</i>    | CCAAT/enhancer binding protein (C/EBP), beta  |
| 12642     | <i>CH25H</i>    | cholesterol 25-hydroxylase                    |
| 12751     | <i>TPP1</i>     | tripeptidyl peptidase 1                       |
| 12767     | <i>CXCR4</i>    | chemokine (C-X-C motif) receptor 4            |
| 12818     | <i>COL14A1</i>  | collagen, type XIV, alpha 1                   |
| 12819     | <i>COL15A1</i>  | collagen, type XV, alpha 1                    |
| 12978     | <i>CSF1R</i>    | colony stimulating factor 1 receptor          |
| 12986     | <i>CSF3R</i>    | predicted gene 4223                           |
| 13014     | <i>CSTB</i>     | cystatin B                                    |
| 13030     | <i>CTSB</i>     | cathepsin B                                   |
| 13032     | <i>CTSC</i>     | cathepsin C                                   |
| 13170     | <i>DBP</i>      | D site albumin promoter binding protein       |
| 13421     | <i>DNASE1L3</i> | deoxyribonuclease 1-like 3                    |
| 13537     | <i>DUSP2</i>    | dual specificity phosphatase 2                |
| 13650     | <i>RHBDF1</i>   | rhomboid family 1 (Drosophila)                |
| 13653     | <i>EGR1</i>     | early growth response 1                       |
| 13733     | <i>EMR1</i>     | EGF-like module containing                    |
| 13808     | <i>ENO3</i>     | enolase 3, beta muscle                        |
| 13822     | <i>EPB4.1L2</i> | erythrocyte protein band 4.1-like 2           |
| 13849     | <i>EPHX1</i>    | epoxide hydrolase 1, microsomal               |
| 14129     | <i>FCGR1</i>    | Fc receptor, IgG, high affinity I             |
| 14281     | <i>FOS</i>      | FBJ osteosarcoma oncogene                     |
| 14289     | <i>FPR2</i>     | formyl peptide receptor 2                     |
| 14345     | <i>FUT4</i>     | fucosyltransferase 4                          |
| 14388     | <i>GAB1</i>     | growth factor receptor bound protein 2        |
| 14456     | <i>GAS6</i>     | growth arrest specific 6                      |
| 14562     | <i>GDF3</i>     | growth differentiation factor 3               |
| 14594     | <i>GGTA1</i>    | glycoprotein galactosyltransferase alpha 1, 3 |
| 14710     | <i>GNGT2</i>    | guanine nucleotide binding protein            |



|       |                 |                                                        |
|-------|-----------------|--------------------------------------------------------|
| 14744 | <i>GPR65</i>    | G-protein coupled receptor 65                          |
| 14825 | <i>CXCL1</i>    | chemokine (C-X-C motif) ligand 1                       |
| 15081 | <i>H3F3B</i>    | predicted gene 14383                                   |
| 15199 | <i>HEBP1</i>    | heme binding protein 1                                 |
| 15205 | <i>HES1</i>     | hairy and enhancer of split 1 (Drosophila)             |
| 15284 | <i>HLX</i>      | H2.0-like homeobox                                     |
| 15446 | <i>HPGD</i>     | hydroxyprostaglandin dehydrogenase 15 (NAD)            |
| 15478 | <i>HS3ST3A1</i> | heparan sulfate (glucosamine) 3-O-sulfotransferase 3A1 |
| 15483 | <i>HSD11B1</i>  | hydroxysteroid 11-beta dehydrogenase 1                 |
| 15511 | <i>HSPA1B</i>   | heat shock protein 1B                                  |
| 15531 | <i>NDST1</i>    | N-deacetylase/N-sulfotransferase 1                     |
| 15900 | <i>IRF8</i>     | interferon regulatory factor 8                         |
| 15903 | <i>ID3</i>      | inhibitor of DNA binding 3                             |
| 15985 | <i>CD79B</i>    | CD79B antigen                                          |
| 16000 | <i>IGF1</i>     | insulin-like growth factor 1                           |
| 16007 | <i>CYR61</i>    | cysteine rich protein 61                               |
| 16010 | <i>IGFBP4</i>   | insulin-like growth factor binding protein 4           |
| 16153 | <i>IL10</i>     | interleukin 10                                         |
| 16154 | <i>IL10RA</i>   | interleukin 10 receptor, alpha                         |
| 16155 | <i>IL10RB</i>   | interleukin 10 receptor, beta                          |
| 16408 | <i>ITGAL</i>    | integrin alpha L                                       |
| 16419 | <i>ITGB5</i>    | integrin beta 5                                        |
| 16449 | <i>JAG1</i>     | jagged 1                                               |
| 16598 | <i>KLF2</i>     | Kruppel-like factor 2 (lung)                           |
| 16653 | <i>KRAS</i>     | similar to GTPase KRas precursor                       |
| 16658 | <i>MAFB</i>     | v-maf musculoaponeurotic fibrosarcoma oncogene family  |
| 16783 | <i>LAMP1</i>    | lysosomal-associated membrane protein 1                |
| 16784 | <i>LAMP2</i>    | lysosomal-associated membrane protein 2                |
| 16905 | <i>LMNA</i>     | lamin A                                                |
| 16988 | <i>LST1</i>     | leukocyte specific transcript 1                        |
| 17064 | <i>CD93</i>     | CD93 antigen                                           |
| 17085 | <i>LY9</i>      | lymphocyte antigen 9                                   |
| 17087 | <i>LY96</i>     | lymphocyte antigen 96                                  |
| 17105 | <i>LYZ2</i>     | lysozyme 2                                             |
| 17127 | <i>SMAD3</i>    | MAD homolog 3 (Drosophila)                             |
| 17260 | <i>MEF2C</i>    | myocyte enhancer factor 2C                             |
| 17289 | <i>MERTK</i>    | c-mer proto-oncogene tyrosine kinase                   |
| 17329 | <i>CXCL9</i>    | chemokine (C-X-C motif) ligand 9                       |
| 17381 | <i>MMP12</i>    | matrix metalloproteinase 12                            |
| 17386 | <i>MMP13</i>    | matrix metalloproteinase 13                            |
| 17387 | <i>MMP14</i>    | matrix metalloproteinase 14 (membrane-inserted)        |
| 17474 | <i>CLEC4D</i>   | C-type lectin domain family 4, member d                |
| 17684 | <i>CITED2</i>   | Chp/p300-interacting transactivator                    |
| 17872 | <i>PPP1R15A</i> | protein phosphatase 1                                  |
| 17921 | <i>MYO7A</i>    | myosin VIIA                                            |
| 18008 | <i>NES</i>      | nestin                                                 |
| 18022 | <i>NFE2</i>     | nuclear factor, erythroid derived 2                    |
| 18173 | <i>SLC11A1</i>  | solute carrier family 11                               |
| 18175 | <i>NRAP</i>     | nebulin-related anchoring protein                      |
| 18412 | <i>SQSTM1</i>   | sequestosome 1                                         |
| 18590 | <i>PDGFA</i>    | platelet derived growth factor, alpha                  |
| 18669 | <i>ABCB1B</i>   | ATP-binding cassette, sub-family B, member 1B          |
| 18689 | <i>PHXR4</i>    | per-hexamer repeat gene 4                              |

|       |                  |                                                             |
|-------|------------------|-------------------------------------------------------------|
| 18751 | <i>PRKCB</i>     | protein kinase C, beta                                      |
| 18805 | <i>PLD1</i>      | phospholipase D1                                            |
| 18807 | <i>PLD3</i>      | phospholipase D family, member 3                            |
| 18858 | <i>PMP22</i>     | peripheral myelin protein 22                                |
| 18987 | <i>POU2F2</i>    | POU domain, class 2, transcription factor 2                 |
| 19039 | <i>LGALS3BP</i>  | lectin, galactoside-binding, soluble, 3 binding protein     |
| 19141 | <i>LGMN</i>      | legumain                                                    |
| 19159 | <i>CYTH3</i>     | cytohesin 3                                                 |
| 19229 | <i>PTK2B</i>     | PTK2 protein tyrosine kinase 2 beta                         |
| 19261 | <i>SIRPA</i>     | signal-regulatory protein alpha                             |
| 19340 | <i>RAB3D</i>     | RAB3D, member RAS oncogene family                           |
| 19703 | <i>RENBP</i>     | renin binding protein                                       |
| 19731 | <i>RGL1</i>      | ral guanine nucleotide dissociation stimulator,-like 1      |
| 20230 | <i>SATB1</i>     | special AT-rich sequence binding protein 1                  |
| 20293 | <i>CCL12</i>     | chemokine (C-C motif) ligand 12                             |
| 20302 | <i>CCL3</i>      | chemokine (C-C motif) ligand 3                              |
| 20310 | <i>CXCL2</i>     | chemokine (C-X-C motif) ligand 2                            |
| 20317 | <i>SERPINF1</i>  | serine (or cysteine) peptidase inhibitor, clade F, member 1 |
| 20363 | <i>SEPP1</i>     | selenoprotein P, plasma, 1                                  |
| 20393 | <i>SGK1</i>      | serum/glucocorticoid regulated kinase 1                     |
| 20715 | <i>SERPINA3G</i> | serinepeptidase inhibitor, clade A, member 3G               |
| 20719 | <i>SERPINB6A</i> | serine peptidase inhibitor, clade B, member 6a              |
| 20728 | <i>SPIC</i>      | Spi-C transcription factor (Spi-1/PU.1 related)             |
| 21452 | <i>TCN2</i>      | transcobalamin 2                                            |
| 21743 | <i>INMT</i>      | indolethylamine N-methyltransferase                         |
| 21809 | <i>TGFB3</i>     | transforming growth factor, beta 3                          |
| 21810 | <i>TGFB1</i>     | transforming growth factor, beta induced                    |
| 21812 | <i>TGFBRI</i>    | transforming growth factor, beta receptor I                 |
| 21813 | <i>TGFBRII</i>   | transforming growth factor, beta receptor II                |
| 21817 | <i>TGM2</i>      | transglutaminase 2, C polypeptide                           |
| 21824 | <i>THBD</i>      | thrombomodulin                                              |
| 21858 | <i>TIMP2</i>     | tissue inhibitor of metalloproteinase 2                     |
| 21897 | <i>TLR1</i>      | toll-like receptor 1                                        |
| 21926 | <i>TNF</i>       | tumor necrosis factor                                       |
| 21928 | <i>TNFAIP2</i>   | tumor necrosis factor, alpha-induced protein 2              |
| 21985 | <i>TPD52</i>     | similar to Tpd52 protein; tumor protein D52                 |
| 22022 | <i>TPST2</i>     | protein-tyrosine sulfotransferase 2                         |
| 22234 | <i>UGCG</i>      | UDP-glucose ceramide glucosyltransferase                    |
| 22249 | <i>UNC13B</i>    | unc-13 homolog B (C. elegans)                               |
| 22259 | <i>NRIH3</i>     | nuclear receptor subfamily 1, group H, member 3             |
| 22329 | <i>VCAM1</i>     | vascular cell adhesion molecule 1                           |
| 22341 | <i>VEGFC</i>     | vascular endothelial growth factor C                        |
| 23849 | <i>KLF6</i>      | Kruppel-like factor 6                                       |
| 23872 | <i>ETS2</i>      | E26 avian leukemia oncogene 2, 3' domain                    |
| 23880 | <i>FYB</i>       | FYN binding protein                                         |
| 23886 | <i>GDF15</i>     | growth differentiation factor 15                            |
| 23890 | <i>GPR34</i>     | G protein-coupled receptor 34                               |
| 23962 | <i>OASL2</i>     | 2'-5' oligoadenylate synthetase-like 2                      |
| 24055 | <i>SH3BP2</i>    | SH3-domain binding protein 2                                |
| 24088 | <i>TLR2</i>      | toll-like receptor 2                                        |
| 24099 | <i>TNFSF13B</i>  | tumor necrosis factor (ligand) superfamily, member 13b      |
| 26433 | <i>PLOD3</i>     | procollagen-lysine, 2-oxoglutarate 5-dioxygenase 3          |
| 26930 | <i>PPNR</i>      | per-pentamer repeat gene                                    |

|       |                      |                                                               |
|-------|----------------------|---------------------------------------------------------------|
| 26943 | <i>SERINC3</i>       | serine incorporator 3                                         |
| 27052 | <i>AOAH</i>          | acyloxyacyl hydrolase                                         |
| 27226 | <i>PLA2G7</i>        | phospholipase A2, group VII                                   |
| 27261 | <i>DOK3</i>          | docking protein 3                                             |
| 29819 | <i>STAU2</i>         | staufer (RNA binding protein) homolog 2 (Drosophila)          |
| 30794 | <i>PDLIM4</i>        | PDZ and LIM domain 4                                          |
| 50778 | <i>RGS1</i>          | regulator of G-protein signaling 1                            |
| 50794 | <i>KLF13</i>         | Kruppel-like factor 13                                        |
| 50934 | <i>SLC7A8</i>        | solute carrier family 7                                       |
| 52076 | <i>TMEM38B</i>       | transmembrane protein 38B                                     |
| 52120 | <i>HGSNAT</i>        | heparan-alpha-glucosaminide N-acetyltransferase               |
| 52163 | <i>CAMK1</i>         | calcium/calmodulin-dependent protein kinase I                 |
| 52588 | <i>TSPAN14</i>       | tetraspanin 14                                                |
| 52855 | <i>LAIR1</i>         | leukocyte-associated Ig-like receptor 1                       |
| 53791 | <i>TLR5</i>          | toll-like receptor 5                                          |
| 53945 | <i>SLC40A1</i>       | solute carrier family 40 member 1                             |
| 54123 | <i>IRF7</i>          | interferon regulatory factor 7                                |
| 54486 | <i>HPGDS</i>         | prostaglandin D2 synthase 2, hematopoietic                    |
| 54613 | <i>ST3GAL6</i>       | ST3 beta-galactoside alpha-2,3-sialyltransferase 6            |
| 54711 | <i>PLAGL2</i>        | pleiomorphic adenoma gene-like 2                              |
| 54725 | <i>CADMI</i>         | cell adhesion molecule 1                                      |
| 55942 | <i>SERTAD1</i>       | SERTA domain containing 1                                     |
| 55985 | <i>CXCL13</i>        | chemokine (C-X-C motif) ligand 13                             |
| 56278 | <i>GKAP1</i>         | G kinase anchoring protein 1                                  |
| 56312 | <i>NUPR1</i>         | nuclear protein 1                                             |
| 56504 | <i>SRPK3</i>         | serine/arginine-rich protein specific kinase 3                |
| 56619 | <i>CLEC4E</i>        | C-type lectin domain family 4, member e                       |
| 56744 | <i>PF4</i>           | platelet factor 4                                             |
| 56807 | <i>SCAMP5</i>        | secretory carrier membrane protein 5                          |
| 57266 | <i>CXCL14</i>        | chemokine (C-X-C motif) ligand 14                             |
| 58185 | <i>RSAD2</i>         | radical S-adenosyl methionine domain containing 2             |
| 58218 | <i>TREM3</i>         | triggering receptor expressed on myeloid cells 3              |
| 60406 | <i>SAP30</i>         | sin3 associated polypeptide                                   |
| 63959 | <i>SLC29A1</i>       | solute carrier family 29, member 1                            |
| 65256 | <i>ASB2</i>          | ankyrin repeat and SOCS box-containing 2                      |
| 66168 | <i>GRINA</i>         | glutamate receptor                                            |
| 66566 | <i>2310079N02RIK</i> | RIKEN cDNA 2310079N02 gene                                    |
| 66610 | <i>ABI3</i>          | ABI gene family, member 3                                     |
| 66868 | <i>MFSD1</i>         | major facilitator superfamily domain containing 1             |
| 66881 | <i>PCYOX1</i>        | prenylcysteine oxidase 1                                      |
| 66961 | <i>NEAT1</i>         | RIKEN cDNA 2310043N10 gene                                    |
| 67168 | <i>LPAR6</i>         | purinergic receptor P2Y, G-protein coupled, 5                 |
| 67263 | <i>ZSWIM6</i>        | zinc finger, SWIM domain containing 6                         |
| 67399 | <i>PDLIM7</i>        | PDZ and LIM domain 7                                          |
| 67603 | <i>DUSP6</i>         | dual specificity phosphatase 6                                |
| 67865 | <i>RGS10</i>         | regulator of G-protein signalling 10                          |
| 67893 | <i>TMEM86A</i>       | transmembrane protein 86A                                     |
| 68682 | <i>SLC44A2</i>       | solute carrier family 44, member 2                            |
| 68728 | <i>TRP53INP2</i>     | transformation related protein 53 inducible nuclear protein 2 |
| 69068 | <i>1810011O10RIK</i> | RIKEN cDNA 1810011O10 gene                                    |
| 69226 | <i>SNX24</i>         | sorting nexin 24                                              |
| 70564 | <i>5730469M10RIK</i> | RIKEN cDNA 5730469M10 gene                                    |
| 70720 | <i>6330407A03RIK</i> | RIKEN cDNA 6330407A03 gene                                    |

|        |                      |                                                             |
|--------|----------------------|-------------------------------------------------------------|
| 71602  | <i>MYO1E</i>         | myosin IE                                                   |
| 71712  | <i>DRAM1</i>         | RIKEN cDNA 1200002N14 gene                                  |
| 73149  | <i>CLEC4A3</i>       | C-type lectin domain family 4, member a3                    |
| 74048  | <i>4632428N05RIK</i> | RIKEN cDNA 4632428N05 gene                                  |
| 74096  | <i>HVCN1</i>         | hydrogen voltage-gated channel 1                            |
| 74136  | <i>SEC14L1</i>       | SEC14-like 1 ( <i>S. cerevisiae</i> )                       |
| 74191  | <i>P2RY13</i>        | purinergic receptor P2Y, G-protein coupled 13               |
| 74747  | <i>DDIT4</i>         | DNA-damage-inducible transcript 4                           |
| 74772  | <i>ATP13A2</i>       | ATPase type 13A2                                            |
| 74777  | <i>SEPN1</i>         | selenoprotein N, 1                                          |
| 76408  | <i>ABCC3</i>         | ATP-binding cassette, sub-family C, member 3                |
| 77976  | <i>NUAK1</i>         | NUAK family, SNF1-like kinase, 1                            |
| 80281  | <i>CTTNBP2NL</i>     | CTTNBP2 N-terminal like                                     |
| 83433  | <i>TREM2</i>         | triggering receptor expressed on myeloid cells 2            |
| 83490  | <i>PIK3AP1</i>       | phosphoinositide-3-kinase adaptor protein 1                 |
| 93695  | <i>GPNCMB</i>        | glycoprotein (transmembrane) nmb                            |
| 98878  | <i>EHD4</i>          | EH-domain containing 4                                      |
| 99543  | <i>OLFML3</i>        | olfactomedin-like 3                                         |
| 100198 | <i>H6PD</i>          | hexose-6-phosphate dehydrogenase                            |
| 100213 | <i>RUSC2</i>         | RUN and SH3 domain containing 2                             |
| 101488 | <i>SLCO2B1</i>       | solute carrier organic anion transporter family, member 2b1 |
| 102657 | <i>CD276</i>         | CD276 antigen                                               |
| 103210 | <i>D630004K10RIK</i> | RIKEN cDNA D630004K10 gene                                  |
| 103724 | <i>TBC1D10A</i>      | TBC1 domain family, member 10a                              |
| 104099 | <i>ITGA9</i>         | integrin alpha 9                                            |
| 104252 | <i>CDC42EP2</i>      | CDC42 effector protein (Rho GTPase binding) 2               |
| 106952 | <i>ARAP3</i>         | ArfGAP with RhoGAP domain                                   |
| 107607 | <i>NOD1</i>          | nucleotide-binding oligomerization domain containing 1      |
| 108089 | <i>RNF144A</i>       | ring finger protein 144A                                    |
| 109225 | <i>MSA47</i>         | membrane-spanning 4-domains, subfamily A, member 7          |
| 110454 | <i>LY6A</i>          | lymphocyte antigen 6 complex, locus A                       |
| 114606 | <i>TLE6</i>          | transducin-like enhancer of split 6                         |
| 140488 | <i>IGF2BP3</i>       | insulin-like growth factor 2 mRNA binding protein 3         |
| 140497 | <i>AF251705</i>      | cDNA sequence AF251705                                      |
| 140795 | <i>P2RY14</i>        | purinergic receptor P2Y, G-protein coupled, 14              |
| 170460 | <i>STARD5</i>        | StAR-related lipid transfer (START) domain containing 5     |
| 170625 | <i>SNX18</i>         | sorting nexin 18                                            |
| 170743 | <i>TLR7</i>          | toll-like receptor 7                                        |
| 170744 | <i>TLR8</i>          | toll-like receptor 8                                        |
| 192187 | <i>STAB1</i>         | stabilin 1                                                  |
| 192654 | <i>PLA2G15</i>       | phospholipase A2, group XV                                  |
| 192678 | <i>RASSF3</i>        | Ras association domain family member 3                      |
| 195522 | <i>ZFP691</i>        | zinc finger protein 691                                     |
| 207521 | <i>DTX4</i>          | deltex 4 homolog ( <i>Drosophila</i> )                      |
| 209200 | <i>DTX3L</i>         | deltex 3-like ( <i>Drosophila</i> )                         |
| 210530 | <i>LEPREL1</i>       | leprecan-like 1                                             |
| 210808 | <i>9030625A04RIK</i> | RIKEN cDNA 9030625A04 gene                                  |
| 213002 | <i>IFITM6</i>        | interferon induced transmembrane protein 6                  |
| 213573 | <i>EFCAB4A</i>       | EF-hand calcium binding domain 4A                           |
| 215900 | <i>FAM26F</i>        | family with sequence similarity 26, member F                |
| 216805 | <i>FLCN</i>          | folliculin                                                  |
| 216869 | <i>ARRB2</i>         | arrestin, beta 2                                            |
| 216991 | <i>ADAP2</i>         | ArfGAP with dual PH domains 2                               |

|           |                      |                                                            |
|-----------|----------------------|------------------------------------------------------------|
| 217333    | <i>TRIM47</i>        | tripartite motif-containing 47                             |
| 218454    | <i>LHFPL2</i>        | lipoma HMGIC fusion partner-like 2                         |
| 218624    | <i>IL31RA</i>        | interleukin 31 receptor A                                  |
| 218793    | <i>UBE2E2</i>        | ubiquitin-conjugating enzyme E2E 2                         |
| 224454    | <i>ZDHHC14</i>       | zinc finger, DHHC domain containing 14                     |
| 224794    | <i>ENPP4</i>         | ectonucleotide pyrophosphatase 4                           |
| 224840    | <i>TREML4</i>        | triggering receptor on myeloid cells-like 4                |
| 225884    | <i>BC021614</i>      | cDNA sequence BC021614                                     |
| 226421    | <i>5430435G22RIK</i> | RIKEN cDNA 5430435G22 gene                                 |
| 226519    | <i>LAMC1</i>         | laminin, gamma 1                                           |
| 226691    | <i>AI607873</i>      | expressed sequence AI607873                                |
| 227612    | <i>A830007P12RIK</i> | RIKEN cDNA A830007P12 gene                                 |
| 227620    | <i>UAP1L1</i>        | UDP-N-acetylglucosamine pyrophosphorylase 1-like 1         |
| 228545    | <i>VPS18</i>         | vacuolar protein sorting 18 (yeast)                        |
| 228608    | <i>SMOX</i>          | spermine oxidase                                           |
| 229595    | <i>ADAMTSL4</i>      | ADAMTS-like 4                                              |
| 229599    | <i>GM129</i>         | predicted gene 129                                         |
| 231507    | <i>PLAC8</i>         | placenta-specific 8                                        |
| 231633    | <i>TMEM119</i>       | transmembrane protein 119                                  |
| 231991    | <i>CREB5</i>         | RIKEN cDNA 9430076C15 gene                                 |
| 232288    | <i>FRMD4B</i>        | FERM domain containing 4B                                  |
| 232801    | <i>LILRA5</i>        | predicted gene 4878                                        |
| 232984    | <i>B3GNT8</i>        | beta-1,3-N-acetylglucosaminyltransferase 8                 |
| 233016    | <i>BLVRB</i>         | biliverdin reductase B (flavin reductase (NADPH))          |
| 233079    | <i>FFAR2</i>         | free fatty acid receptor 2                                 |
| 233571    | <i>P2RY6</i>         | pyrimidinergic receptor P2Y, G-protein coupled, 6          |
| 233979    | <i>TPCN2</i>         | two pore segment channel 2                                 |
| 234595    | <i>SLC38A7</i>       | predicted gene 3599; solute carrier family 38, member 7    |
| 239027    | <i>ARHGAP22</i>      | Rho GTPase activating protein 22                           |
| 239827    | <i>PIGZ</i>          | phosphatidylinositol glycan anchor biosynthesis, class Z   |
| 243725    | <i>PPP1R9A</i>       | protein phosphatase 1, regulatory (inhibitor) subunit 9A   |
| 244853    | <i>FAM55D</i>        | family with sequence similarity 55, member D               |
| 245190    | <i>GM4980</i>        | predicted gene 4980                                        |
| 246256    | <i>FCGR4</i>         | Fc receptor, IgG, low affinity IV                          |
| 246278    | <i>CD207</i>         | CD207 antigen                                              |
| 246696    | <i>SLC25A28</i>      | solute carrier family 25, member 28                        |
| 246707    | <i>EMILIN2</i>       | elastin microfibril interfacier 2                          |
| 268973    | <i>NLR4</i>          | NLR family, CARD domain containing 4                       |
| 269181    | <i>MGAT4A</i>        | mannoside acetylglucosaminyltransferase 4, isoenzyme A     |
| 269799    | <i>CLEC4A1</i>       | C-type lectin domain family 4, member a1                   |
| 269951    | <i>IDH2</i>          | isocitrate dehydrogenase 2 (NADP+), mitochondrial          |
| 270118    | <i>MAML2</i>         | similar to Maml2 protein; mastermind like 2 (Drosophila)   |
| 319939    | <i>TNS3</i>          | tensin 3                                                   |
| 320024    | <i>NCEH1</i>         | arylacetamide deacetylase-like 1                           |
| 327957    | <i>A430084P05RIK</i> | RIKEN cDNA A430084P05 gene                                 |
| 328314    | <i>GMS086</i>        | predicted gene 5086                                        |
| 330635    | <i>3830612M24</i>    | hypothetical protein 3830612M24                            |
| 381484    | <i>GMS150</i>        | predicted gene 5150; similar to SIRP beta 1 like 1 protein |
| 383435    | <i>MS4A14</i>        | membrane-spanning 4-domains, subfamily A, member 14        |
| 436440    | <i>GPR31C</i>        | predicted gene 8593                                        |
| 574428    | <i>ZMYND15</i>       | zinc finger, MYND-type containing 15                       |
| 100038947 | <i>LOC100038947</i>  | signal-regulatory protein beta 1                           |
| 100039795 | <i>ILDR2</i>         | immunoglobulin-like domain containing receptor 2           |
| 100043272 | <i>5430417L22RIK</i> | similar to F32B6.11                                        |

Supplementary table 4  
Real-Time PCR primers used in this article

| Target           | Primer 5'-3'               | Species |
|------------------|----------------------------|---------|
| Csf-1r forward   | CGAGGGAGACTCCA<br>GCTACA   | mouse   |
| Csf-1r reverse   | GACTGGAGAAGCCA<br>CTGTCC   | mouse   |
| Flt3 forward     | GAGCGACTCCAGCT<br>ACGTC    | mouse   |
| Flt3 reverse     | ACCCAGTGAAAATAT<br>CTCCAGA | mouse   |
| Irf4 forward     | ACAGCACCTTATGGC<br>TCTCTG  | mouse   |
| Irf4 reverse     | ATGGGGTGGCATCAT<br>GTAGT   | mouse   |
| Irf8 forward     | CCTATGACACACACC<br>ATTCAGC | mouse   |
| Irf8 reverse     | AGAGACGGCAGCCT<br>TCAA     | mouse   |
| Hprt forward     | TCCTCCTCAGACCGC<br>TTTT    | mouse   |
| Hprt reverse     | CCTGGTTCATCATCG<br>CTAATC  | mouse   |
| Id2 forward      | GACAGAACCAGGCG<br>TCCA     | mouse   |
| Id2 reverse      | AGCTCAGAAGGGAA<br>TTCAGATG | mouse   |
| Batf3 forward    | AGAAGGCTGACAAG<br>CTCCAC   | mouse   |
| Batf3 reverse    | CCTTCAGCTTCGAAA<br>TCTCC   | mouse   |
| Il-23p19 forward | AACAGCCAGTTCTGC<br>TTGC    | mouse   |
| Il-23p19 reverse | AGGGAGGTGTGAAG<br>TTGCTC   | mouse   |
| Ccr7 forward     | CAGGGAAACCCAGG<br>AAAAAC   | mouse   |
| Ccr7 reverse     | TCATCTGGCAGAAG<br>CACAC    | mouse   |
| Il-23p19 forward | CCCAAGGACTCAGG<br>GACAAC   | human   |
| Il-23p19 reverse | TCAGACCCTGGTGG<br>ATCCTT   | human   |

## Supplemental Experimental Procedures

### Mice

C57BL/6 (CD45.2<sup>+</sup>) mice were purchased from the Biological Resource Center (BRC), Agency for Science, Technology and Research (A\*STAR), Singapore. Congenic C57BL/6 (CD45.1<sup>+</sup>), B6.129S1-*Irf4*<sup>tm1Rdf</sup>/J (*Irf4*<sup>fl/fl</sup>), B6.Cg-Tg(*Itgax-cre*)1-1Reiz/J (*Itgax-cre*), B6.129P-Cx3cr1<sup>tm1Litt</sup>/J mice were purchased from the Jackson Laboratory (Jackson Laboratory, Bar Harbor, USA). DC-specific Cre recombinase mouse (*Itgax-cre*) was crossed with the *Irf4*<sup>fl/fl</sup> to produce mice which are deficient for IRF4 in the DC lineage (*Itgax-cre Irf4*<sup>fl/fl</sup>). *Itgax-cre Irf4*<sup>fl/fl</sup> were negative (tested by Q-PCR) for segmented filamentous bacteria (SFB) (Ivanov et al., 2009). OTII-Rag1 mice (Barnden et al., 1998) were obtained from Taconic (Taconic Farms, USA) through the NIAID Exchange Program, NIH line number 4234. Fucci-492 mice (Sakaue-Sawano et al., 2008) were purchased from the Riken BioResource Center (Ibaraki, Japan). Langerin-DTR mice were provided by Dr. Bernard Malissen (Centre d'Immunologie de Marseille-Luminy, France). Lysozyme-GFP mice were kindly provided by Dr. Thomas Graf. All mice were bred and maintained in our animal facility, and analyzed between 8-12 weeks of age. All experiments and procedures were approved by the Institutional Animal Care and Use Committee (IACUC) of A\*STAR (Biopolis, Singapore) in accordance with the guidelines of the Agri-Food and Veterinary Authority (AVA) and the National Advisory Committee for Laboratory Animal Research (NACLAR) of Singapore.

### Restimulation of T-Cells

Murine T-cells were restimulated for 6h using 50ng/ml Phorbol myristate acetate (PMA, Sigma) and 1ng/ml Ionomycin (Iono, Sigma), Brefeldin A was added after 2h of stimulation. Cells were stained intracellularly as described below.

### Flow Cytometry and Cell Sorting (Igs and Clones in Supp)

Flow cytometry was performed on an LSR II or FACS Canto (Becton Dickinson, San Jose, USA) and analyzed with FlowJo software (Tree Star, Ashland, USA). Fluorochrome or biotin-conjugated monoclonal antibodies (mAbs) specific to mouse IA/IE (M5/114.15.2), CD103 (2E7), SIRPa (P84), CD11b (M1/70), CD11c (N418), CD45 (30F11), CD45.1 (A20), CD45.2 (104), CD115 (AFS98), Gr-1 (RB6-8C5), F4/80 (A3-1), CD3 (17A2), CD4 (L3T4), CD24 (M1/69), CD64 (X54-5/7.1) CD26 (H194-112), CD172 (P84), EpCAM (G8.8), IL-17A (TC11-18H10.1), IFN- $\gamma$  (XMG1.2) and IRF4 (3E4) the corresponding isotype controls and the secondary reagents were purchased either from BD Biosciences (San Jose, USA), Ebiosciences (San Diego, USA) or Serotech (Raleigh, USA). For human tissue analysis the following antibodies were used CD3, CD7, CD19, CD20, CD56, CD2 (TS1/8), IFN- $\gamma$  (4S.B3), IL-17A (eBio64DEC17), CD45 (HI30), HLA-DR (Q10052), CD11c (B-ly6), CD14 (M5E2), CD16 (3G8), CD1c (AD5-8E7), CD1a (HI149), CD64 (10.1), CD11b (ICRF44), CD141 (AD5-14H12) CD172 (B4B6), BTLA (MIH26), CX3CR1 (2A9-1) and IRF4 (3E4).

### Quantitative Real-Time PCR

Real-Time PCR was performed as described previously (Haniffa et al., 2012). Primer pairs used are described in Supplementary Table 4.

### **In Vivo Reconstitution Assays**

*FLT3*<sup>-/-</sup> C57BL/6 BM was provided by Dr. Ihor Lemischka (Mount Sinai School of Medicine, New York, USA). *IRF4*<sup>-/-</sup> C57BL/6 bone marrow was provided by Dr. Axel Kallies (Walter and Eliza Hall Institute, Australia) and Dr Tak Mak (University of Toronto, Canada). *CSF-1R*<sup>-/-</sup> C57BL/6 fetal liver was provided by Dr. E. Richard Stanley (Albert Einstein College of Medicine, New York, USA). Recipient CD45.1<sup>+</sup> C57BL/6 mice were lethally irradiated (2x 600 rad, 3 hr apart using a Cesium source) and reconstituted with a mixture of CD45.1<sup>+</sup> WT BM and CD45.2<sup>+</sup> BM or fetal liver cells isolated from WT or mutant mice. Engraftment was assessed by measuring the % of donor cells among blood Ly6C/G<sup>+</sup> granulocytes 4 weeks after transplantation. Mice were analyzed two months post-transplant and the proportion of lung, LLN and splenic DC and MAC subset derived from WT (CD45.1) and KO (CD45.2) cells was determined. To enforce engraftment of the different donor BMs a 90:10 ratio was used for *FLT3*<sup>-/-</sup> and *CSF-1R*<sup>-/-</sup> BM and a 60:40 ratio was used for *IRF4*<sup>-/-</sup> BM.

### **Nanostring analysis of mouse DC subsets**

10000 FACS sorted small intestinal dendritic cells were lysed and analyzed using the nCounter GX mouse inflammation Kit and the nCounter system (Nanostring Technologies, Seattle, USA). Cut-off for non-specific probe binding was the mean of individual lanes negative probes supplied with the kit. Counts were normalized to the geometric means of the supplied positive controls and 5 housekeeping genes, as recommended by the manufacturer. Normalized counts from log<sub>10</sub> transformed mean derived from triplicate analysis are shown.

### **Mitotracker Red Staining**

Purified mouse lung CD11b<sup>+</sup> DCs were sorted as described before and were stained for 30min at 37°C with 12.5nM of Mitotracker Red and counterstained with DAPI. Images were acquired on an Olympus FV-1000 confocal system.

### **OTII Proliferation Assay**

DCs and macrophages were FACS-sorted from lungs of mice immunized intratracheally with ova 18h before. OTII T cells were negatively selected from the spleens of OTII-*Rag1*<sup>-/-</sup> mice using the CD4<sup>+</sup> T cell enrichment kit (Miltenyi Biotec, Bergisch Gladbach, Germany). Enriched T cells were washed with PBS, and labeled with 1uM CFSE (Invitrogen). DCs and T-cells were cultured for 72h at a ratio of 1:20 and proliferation was analyzed using flow cytometry.

### **Cytospins and Scanning Electron Microscopy Imaging**

For cytospin, purified cells were spun onto glass slides, dried overnight, stained in Field stain A and B and rinsed in distilled water. Images were analyzed using a Nikon Eclipse E800 microscope (Nikon, Japan) at 10 × 60-fold magnification. Scanning electron microscopy was done as described previously (Haniffa et al., 2012).

### **Microarray Analysis**

In order for cross-species comparison to be made, human orthologs of mouse signatures were first obtained via the R HomoVert package (ver. 0.4.1) (<http://labs.fhcrc.org/fero/R/HomoVert.html>), which uses a Homologene conversion table (Build 64) (<http://www.ncbi.nlm.nih.gov/homologene>). Enrichment of the human ortholog lung CD11b<sup>+</sup> DC signature within the human blood CD1c<sup>+</sup> DC signature was calculated



using a one-tailed hypergeometric test. The same enrichment test was carried out between the human ortholog lung CD11b<sup>+</sup> MAC signature and the human blood CD14<sup>+</sup> monocyte signature. Statistical significance was assessed on a p-value cutoff ( $\alpha < 0.01$ ). Statistical Analyses were carried out using Bioconductor's "lumi" package via the R Programming Language (version 2.12.2) and Accelrys' Pipeline Pilot ([www.accelrys.com](http://www.accelrys.com)). The microarray data are available in the Gene Expression Omnibus (GEO) database (<http://www.ncbi.nlm.nih.gov/gds>) under the accession number GSE46680.

### **Stimulation of Human DCs and Monocytes**

FACS sorted PBMC derived CD1c<sup>+</sup> DCs and CD14<sup>+</sup> monocytes were cultured in 96-well bottomed plates. Cells were stimulated for 24 with *A. fumigatus* hyphae (ratio 1:10), CD40L (1 $\mu$ g/ml, dimerized, Alexis) + LPS (0.1mg/ml), Poly(I:C) (25 $\mu$ g/ml, InvivoGen) or a TLR7/8 agonist (1 $\mu$ g/ml, CL075 (InvivoGen)). Supernatants were collected 24h after stimulation and analyzed for the presence of IL-1 $\beta$ , IL-6, IL-8, IL-10, IL-12p70. Cytokines were detected using BD Cytometric Bead arrays and analyzed with BD-FCAP Array software v1.0. IL-23p19 was measured by ELISA (Ebioscience).

### **Supplementary References**

Barnden, M.J., Allison, J., Heath, W.R., and Carbone, F.R. (1998). Defective TCR expression in transgenic mice constructed using cDNA-based alpha- and beta-chain genes under the control of heterologous regulatory elements. *Immunol Cell Biol* 76, 34-40.

Haniffa, M., Shin, A., Bigley, V., McGovern, N., Teo, P., See, P., Wasan, P.S., Wang, X.N., Malinarich, F., Malleret, B., *et al.* (2012). Human tissues contain CD141<sup>hi</sup> cross-presenting dendritic cells with functional homology to mouse CD103<sup>+</sup> nonlymphoid dendritic cells. *Immunity* 37, 60-73.

Ivanov, II, Atarashi, K., Manel, N., Brodie, E.L., Shima, T., Karaoz, U., Wei, D., Goldfarb, K.C., Santee, C.A., Lynch, S.V., *et al.* (2009). Induction of intestinal Th17 cells by segmented filamentous bacteria. *Cell* 139, 485-498.

Sakaue-Sawano, A., Kurokawa, H., Morimura, T., Hanyu, A., Hama, H., Osawa, H., Kashiwagi, S., Fukami, K., Miyata, T., Miyoshi, H., *et al.* (2008). Visualizing spatiotemporal dynamics of multicellular cell-cycle progression. *Cell* 132, 487-498.
